# Supplementary material
Source: ML conference proceedings conference paper supplement (https://openreview.net/forum?id=DP7kUjUltX)
Supplement: supplementary_material [file Hints.xlsx]

## Sheet: Name of Datasets
Name of file	Information	Name in the code	Affilation
non_qua_output_acrgnn.csv	Dataset that contains results about ACRGNN from Barcelò et al.	df_acrgnn_aggS_combT_cl_all_L_1_10	Barcelò et. al.
dymanic_quantized_results_size_time_pytorch_acrgnn.csv	Dataset that contains results about ACRGNN with Post-Training Dynamic quantization of weights with additional information about the time and size of model	df_acrgnn_aggS_combT_cl_all_L_1_10_dyn_qua_t_s	PTQ dynamic
model_sizes_original_dyn_qua_pytorch_all.csv	Dataset that contains results about ACRGNN, ACRGNN - single with and without Post-Training Dynamic quantization of weights	df_all_gnn_aggS_combT_cl_all_L_1_10_sizes_with_PTQ	PTQ dynamic
	Dataset that contains results about ACRGNN with and without Post-Training Dynamic quantization of weights	df_acrgnn_aggS_combT_cl_all_L_1_10_sizes_with_PTQ	PTQ dynamic
non_qua_output_tr_relu_acrgnn.csv	Dataset that contains results about ACRGNN with trReLU from Barcelò et al.	df_acrgnn_aggS_combT_cl_1_L_1_10_trrelu	Barcelò et. al.
model_sizes_original_dyn_qua_pytorch_acrgnn_trrelu.csv	Dataset that contains results about ACRGNN with trReLU with and without Post-Training Dynamic quantization of weights	df_acrgnn_aggS_combT_cl_1_L_1_10_terelu__sizes_with_PTQ	PTQ dynamic
dymanic_quantized_results_size_time_pytorch_acrgnn_tr_relu.csv	Dataset that contains results about ACRGNN with trReLU with Post-Training Dynamic quantization of weights with additional information about the time and size of model	df_acrgnn_aggS_combT_cl_1_L_1_10_trrelu_dyn_qua_t_s	PTQ dynamic

## Sheet: Functions for plotting
Name of what we want to see plot	Function
Loss vs Number of layers grouped by Comb Layers	compare_feature_with_number_of_layers(dataframe,'loss',['p1'],[1])
Accuracy on node lvl vs Number of layers grouped by Comb Layers	compare_feature_with_number_of_layers(dataframe,"micro",'all',[1])
Accuracy on graph lvl vs Number of layers grouped by Comb Layers	compare_feature_with_number_of_layers(dataframe,"macro",'all',[1])
Compare Size of original model and Quantized one	compare_two_features_from_one_dataset(dataframe_sizes_with_PTQ,'size','size_quantized','all',[1])
Percent change of Size	percentchanges_of_feature(dataframe_sizes_with_PTQ,'size','size_quantized','all',[1],'plot')
Barplort of size changes in MB	plot_barplot(dataframe_sizes_with_PTQ,'size','size_quantized','all',[1])
Compare Loss before and After Quantization	compare_feature_with_number_of_layers_original_vs_dynamic_quantized(dataframe,dataframe_dyn_qua_t_s, "loss",'all',[1])
Compare Accuracy for the Micro(node) lvl before and after Quantization	compare_feature_with_number_of_layers_original_vs_dynamic_quantized(dataframe,dataframe_dyn_qua_t_s, "micro",'all',[1])
Compare Accuracy for the Macro (graph) lvl before and after Quantization	compare_feature_with_number_of_layers_original_vs_dynamic_quantized(dataframe,dataframe_dyn_qua_t_s, "macro",'all',[1])
Compare Elapsed time before and after Quantization	compare_two_features_from_one_dataset(formDataframeFrom2df(dataframe,dataframe_dyn_qua_t_s,'elapsed_time','time_quantized'),'elapsed_time','time_quantized','all',[1])
Bar plot of Time changing before and after Quantization	plot_barplot(formDataframeFrom2df(dataframe,dataframe_dyn_qua_t_s,'elapsed_time','time_quantized'),'elapsed_time','time_quantized','all',[1])
	compare4faturesaccourdingToEachOther(dataframe_dyn_qua_t_s,'sire_original','time_original','size_quantized','time_quantized','all',[1])
Accuracy on node lvl. Changes in percent according to the number of layers	percentchanges_of_features(dataframe,dataframe_dyn_qua_t_s,['train_micro','test1_micro','test2_micro'],'all',[1],'plot')
Accuracy on graph lvl. Changes in percent according to the number of layers	percentchanges_of_features(dataframe,dataframe_dyn_qua_t_s,['train_macro','test1_macro','test2_macro'],'all',[1],'plot')
Function to plot a bar plot to see the difference of the time	plot_bar_to_compare_all_times(dataframe1,dataframe2,feature1,feature2,feature3,keys,combination_layers)

## Sheet: Function for manipulating
Name of what we want to do	Function
Function to print formula in the title	print_keys(key)
Prepare dataset. Extract parameters and reorganize columns	process_dataframe(dataframe)
Function for getting the name of the dataframe	get_dataframe_name(dataframe)
